# Supplementary material for: Molecular Subtypes and Prognostic Signature of Pyroptosis-Related lncRNAs in Glioma Patients
Source: PubMed Central journal article supplement (PMC8884250; doi:10.3389/fonc.2022.779168), 2022-02-14

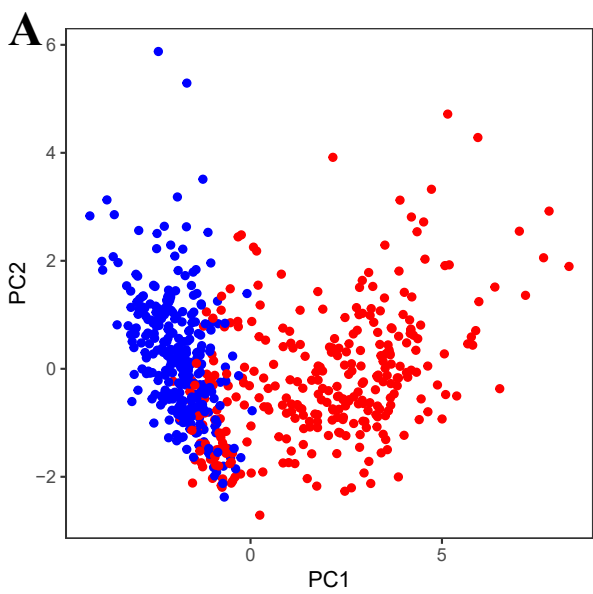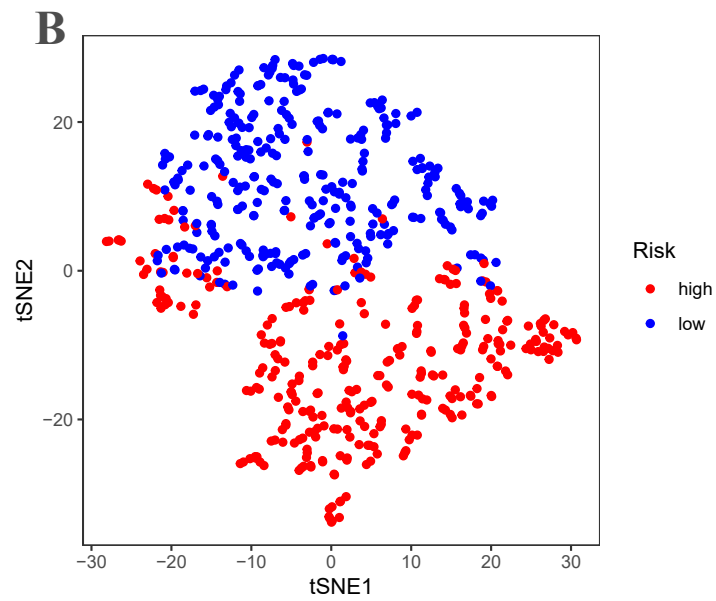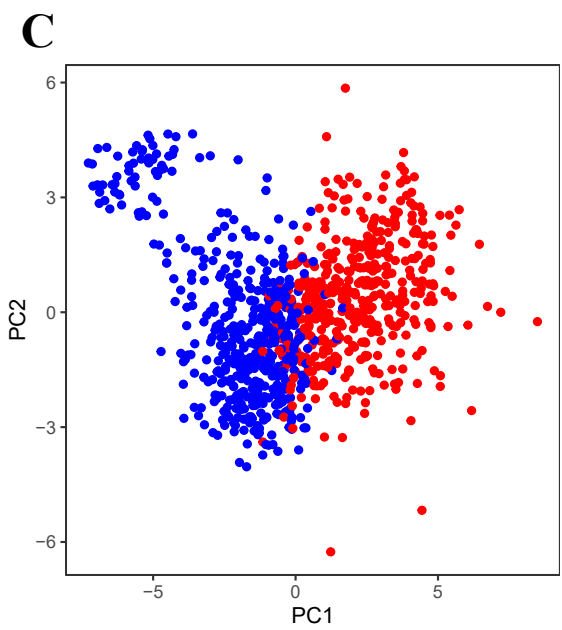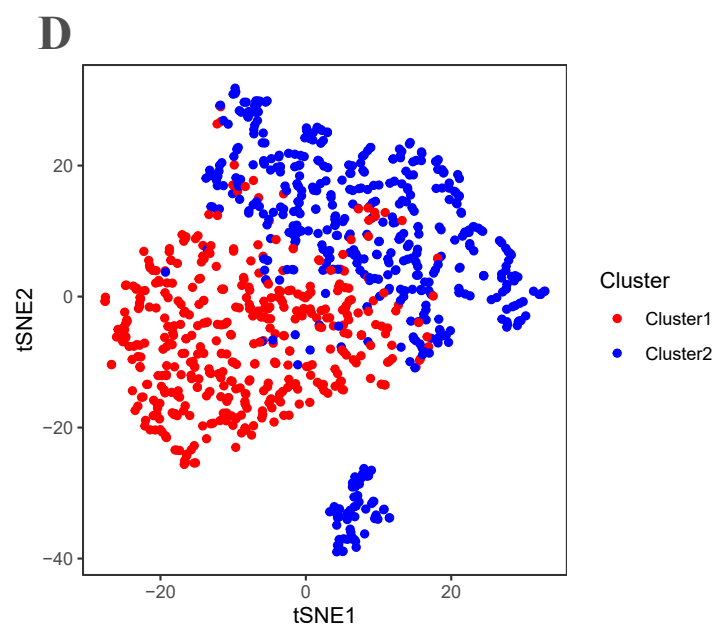

Supplement: DataSheet_1.pdf [file DataSheet_1.pdf]
