# Supplementary material for: Molecular Subtypes and Prognostic Signature of Pyroptosis-Related lncRNAs in Glioma Patients
Source: Front Oncol. 2022 Feb 14;12:779168. doi: 10.3389/fonc.2022.779168 (PMC8884250; doi:10.3389/fonc.2022.779168)
Supplement: Supplementary file 5 [file Table_1.xlsx]

## Sheet: Sheet1
Table S1 23 identified lncRNAs associated with overall survival of glioma in TCGA and CGGA dateset
TCGA					CGGA
gene	HR	HR.95L	HR.95H	p value	gene	HR	HR.95L	HR.95H	p value
CRNDE	1.20764	1.1708	1.24564	7.70553e-33	CRNDE	1.44379	1.37681	1.51402	7.05101e-52
DCST1-AS1	1.84558	1.61668	2.10689	1.18926e-19	DICER1-AS1	0.771445	0.724005	0.821993	1.11523e-15
HCP5	1.06972	1.05379	1.0859	1.33149e-18	HCP5	1.415	1.29478	1.54639	1.82231e-14
ITGB2-AS1	1.43821	1.2352	1.67458	2.85827e-06	ITGB2-AS1	1.29892	1.16151	1.45258	4.55009e-06
LBX2-AS1	1.69064	1.54105	1.85476	1.13567e-28	LBX2-AS1	1.88447	1.69185	2.09903	1.07496e-30
LINC00174	1.18837	1.10605	1.27682	2.45408e-06	LINC00174	1.22507	1.10275	1.36096	0.000155294
LINC00265	1.12781	1.05024	1.21111	0.000939212	LINC00265	1.39075	1.23628	1.56453	3.99903e-08
LINC00339	1.15791	1.12838	1.18822	9.61373e-29	LINC00339	1.76275	1.57513	1.97272	5.47068e-23
LINC00665	1.39907	1.31151	1.49247	2.32774e-24	LINC00665	1.71906	1.51687	1.94819	2.12937e-17
LINC00900	3.10055	2.62421	3.66336	2.4238e-40	LINC00900	1.45953	1.29127	1.64972	1.44714e-09
MIR155HG	1.63307	1.50807	1.76843	1.49028e-33	MIR155HG	1.97453	1.769	2.20393	7.1715e-34
MIR22HG	1.11951	1.09503	1.14454	1.4189e-23	MIR22HG	1.54527	1.42368	1.67726	2.28942e-25
NEAT1	1.06574	1.05033	1.08137	1.06067e-17	NEAT1	1.34438	1.27505	1.41747	6.25621e-28
NNT-AS1	0.77835	0.729951	0.829957	2.00719e-14	NNT-AS1	0.723394	0.654154	0.799964	2.83107e-10
PAXIP1-AS2	1.38551	1.31794	1.45653	2.02956e-37	PAXIP1-AS2	1.90268	1.68841	2.14415	4.96465e-26
PCED1B-AS1	1.17399	1.13475	1.21459	2.30696e-20	PCED1B-AS1	1.20876	1.13539	1.28686	2.94457e-09
SNHG12	1.1446	1.07949	1.21363	6.1904e-06	SNHG12	1.35877	1.24811	1.47924	1.51087e-12
SNHG18	1.27832	1.22953	1.32904	3.90652e-35	SNHG18	1.40025	1.30564	1.50171	4.01711e-21
SOCS2-AS1	1.11799	1.09108	1.14556	2.92393e-19	SOCS2-AS1	1.47461	1.35515	1.60461	2.05503e-19
STAG3L5P-PVRIG2P-PILRB	1.37332	1.1593	1.62685	0.000242502	STAG3L5P-PVRIG2P-PILRB	1.20929	1.08873	1.34319	0.000390341
TPT1-AS1	0.557047	0.435802	0.712023	2.98327e-06	TPT1-AS1	0.810525	0.748738	0.877411	2.07431e-07
TTC28-AS1	0.439022	0.363603	0.530085	1.12836e-17	TTC28-AS1	0.71467	0.642092	0.795453	7.83357e-10
WAC-AS1	0.726542	0.692478	0.762281	7.33641e-39	WAC-AS1	0.747938	0.675998	0.827534	1.8145e-08
