# Supplementary material for: Molecular Subtypes and Prognostic Signature of Pyroptosis-Related lncRNAs in Glioma Patients
Source: Front Oncol. 2022 Feb 14;12:779168. doi: 10.3389/fonc.2022.779168 (PMC8884250; doi:10.3389/fonc.2022.779168)
Supplement: Supplementary file 6 [file Table_2.xls]

## Sheet: riskDiff
Table S2 Differentially expressed genes based on high-and low-risk group
gene	lowMean	highMean	logFC	pValue	fdr
PPIAP31	0.377986	3.36221	3.153	3.1271e-30	1.48472e-29
IGFBP7-AS1	0.782658	3.47175	2.14921	9.10932e-24	3.08059e-23
COL3A1	2.90749	54.825	4.23699	1.67056e-44	2.2512e-43
IGHV3-23	0.235434	2.69808	3.51854	2.62848e-18	6.76736e-18
S100A9	8.92451	55.8666	2.64614	4.61524e-34	2.78626e-33
CRABP1	0.921801	5.98689	2.69928	2.5707e-06	3.69821e-06
FOSL1	0.846841	4.09835	2.27488	8.30637e-45	1.15111e-43
EN1	0.206913	2.2631	3.4512	1.32686e-44	1.80522e-43
RPS3AP26	1.7109	8.48433	2.31005	2.90286e-14	6.14455e-14
HLA-DQA2	2.30431	9.88439	2.10082	2.19024e-20	6.2365e-20
CD163	4.41358	25.7833	2.54642	1.23629e-36	8.88808e-36
TCEA3	0.662459	3.39192	2.3562	6.44867e-46	9.71622e-45
EIF4A1P10	0.367708	2.23856	2.60594	6.22244e-26	2.3526e-25
PTTG1	3.05216	13.0409	2.09514	4.44386e-41	4.39208e-40
HFE	0.420158	1.75752	2.06454	2.5182e-62	3.71514e-60
ANXA2P2	0.343646	5.70068	4.05214	8.00103e-65	2.22193e-62
LGR6	0.280147	3.96105	3.82163	3.49616e-35	2.29135e-34
BZW1P2	0.39324	1.80061	2.19501	1.20322e-34	7.56043e-34
IGHG4	0.326352	4.17698	3.67796	3.72107e-15	8.24363e-15
SDC1	1.11196	5.55044	2.3195	1.27026e-34	7.964e-34
KIF20A	0.745244	3.58604	2.26661	8.33563e-40	7.49096e-39
FTH1P10	0.290821	2.37187	3.02782	1.49262e-30	7.2224e-30
HMGN2P5	1.47479	19.8213	3.74847	3.91647e-38	3.10229e-37
AL513217.1	2.29525	0.539114	-2.08999	1.06326e-53	3.91145e-52
TXLNB	0.35408	1.70176	2.26488	2.62019e-44	3.45528e-43
AC147651.3	0.540265	2.33925	2.1143	1.80488e-52	5.7315e-51
AL355974.2	5.12077	25.6967	2.32715	3.88453e-44	5.01062e-43
EMP3	2.57646	45.812	4.15226	5.50033e-66	2.29121e-63
CENPA	0.508178	2.74491	2.43335	2.44086e-41	2.45525e-40
AC099560.2	1.20913	7.28192	2.59035	1.82134e-19	4.95498e-19
UBL5P2	0.454811	2.04492	2.16871	1.4571e-16	3.44466e-16
IGHG2	1.1867	7.38406	2.63746	7.78739e-24	2.64364e-23
IGLV2-11	0.127594	2.06544	4.01682	6.78159e-17	1.62958e-16
TEAD2	1.94784	7.90035	2.02004	4.20798e-58	2.68458e-56
IGKV3-20	0.572347	7.80887	3.77015	1.13682e-22	3.61897e-22
AL122019.1	3.46711	0.605605	-2.51728	1.22888e-33	7.24591e-33
FABP5P7	0.0796207	3.74114	5.55419	2.60499e-54	1.03346e-52
COL1A1	2.20455	40.0745	4.18413	4.64157e-49	9.72463e-48
IGLV2-14	0.44552	3.79857	3.09189	1.91153e-24	6.70954e-24
MOXD1	1.08985	11.7276	3.42771	1.23958e-51	3.55389e-50
LINC01116	0.820657	3.56622	2.11955	4.82794e-11	8.7924e-11
AC114491.1	0.961477	7.65976	2.99397	3.42866e-26	1.31599e-25
AC074286.1	1.69889	0.360266	-2.23746	4.89544e-68	3.46671e-65
TCTEX1D1	0.246354	3.86784	3.97273	9.16563e-49	1.85712e-47
HSPA7	0.67916	3.16924	2.22231	1.12172e-43	1.36956e-42
GAS2L3	0.322872	1.74285	2.43242	5.55373e-53	1.83779e-51
STC1	0.273206	2.66803	3.28771	3.45814e-35	2.26854e-34
CRTAC1	27.6109	6.46596	-2.0943	3.15865e-70	3.44122e-67
AL049873.1	0.812359	4.16133	2.35686	5.09155e-15	1.11957e-14
SECTM1	0.831339	3.63833	2.12977	4.41705e-43	5.1616e-42
TENT5B	0.351091	1.92173	2.45249	3.76328e-38	2.98931e-37
SPAG4	0.289971	1.7936	2.62888	1.83214e-46	2.8896e-45
IGHA2	0.272175	2.56866	3.23841	1.98057e-19	5.37373e-19
TPT1P4	0.60002	3.32765	2.47142	8.91931e-32	4.69258e-31
MSN	16.4446	76.6961	2.22154	6.84828e-77	4.84961e-73
FAM20A	0.375335	1.90957	2.347	5.2662e-39	4.45019e-38
OCIAD2	1.89015	17.1189	3.17901	3.37638e-49	7.19093e-48
2021-03-04	4.5229	0.946378	-2.25676	2.69174e-33	1.55731e-32
LOXL1	0.4295	3.80471	3.14706	4.31683e-50	1.03102e-48
SHOX2	0.0881231	2.52322	4.8396	1.41538e-59	1.17229e-57
PLAUR	0.940118	5.48391	2.54429	5.49119e-63	9.60144e-61
CLIC1	14.8449	86.4833	2.54245	2.76637e-70	3.26501e-67
CENPK	0.457922	1.88544	2.04173	2.70607e-33	1.56497e-32
XKR8	1.17238	4.93167	2.07264	3.18385e-57	1.81826e-55
TMSB4XP4	0.818937	9.24845	3.49739	4.76364e-49	9.96564e-48
PLA2G5	0.952063	9.2728	3.28388	7.71123e-45	1.07073e-43
FTH1P2	1.4689	7.79458	2.40774	7.13187e-31	3.52069e-30
TPI1P1	1.21782	7.27389	2.57842	6.02261e-26	2.27948e-25
CALHM6	1.21341	4.88939	2.01059	1.29734e-42	1.44452e-41
AC023421.1	1.95794	0.406117	-2.26937	3.11336e-37	2.32568e-36
RPL39L	1.30477	5.52502	2.08219	9.93501e-34	5.88251e-33
PTX3	0.857415	13.1027	3.93373	2.89043e-42	3.10837e-41
TFCP2L1	0.432949	2.08876	2.27038	5.1892e-23	1.68103e-22
DKK1	0.516907	3.47584	2.74939	4.05873e-08	6.39419e-08
CXCL8	1.17841	16.8198	3.83525	3.56632e-23	1.1657e-22
ZMYND10	0.903085	4.03259	2.15877	4.18876e-13	8.41733e-13
LYZ	3.59848	19.1452	2.41153	2.28611e-42	2.48872e-41
AL133415.1	0.207464	3.26016	3.97401	8.31786e-60	7.18328e-58
AL122020.1	0.568916	2.90906	2.35426	4.00364e-21	1.18552e-20
GSX2	0.170116	1.89095	3.47451	2.71038e-42	2.92139e-41
CA3	0.412265	14.9277	5.17828	1.34875e-53	4.86065e-52
TPT1P9	0.675747	5.4218	3.00422	1.99769e-23	6.63538e-23
AC009902.2	0.682302	2.73088	2.00088	1.56317e-33	9.16355e-33
FAM181A	1.87827	8.16725	2.12044	3.15003e-50	7.6264e-49
EFEMP2	3.15129	15.5685	2.30461	4.17352e-52	1.2822e-50
PDGFD	0.699493	2.95654	2.07953	1.01638e-40	9.83934e-40
CHCHD2P6	1.08857	6.49103	2.57601	3.15028e-32	1.70817e-31
PTMAP2	1.37301	7.10694	2.37189	1.95703e-32	1.07515e-31
COL4A1	6.76263	41.8043	2.628	2.22652e-49	4.8664e-48
AL049749.1	3.6515	0.616192	-2.56704	3.24045e-57	1.84315e-55
GRIN3A	2.64251	0.539397	-2.29249	3.41994e-42	3.66389e-41
SNORA73B	0.969934	4.37816	2.17437	2.66486e-16	6.2271e-16
CHI3L2	5.73864	68.5966	3.57935	5.82642e-58	3.68391e-56
SLC43A3	1.23122	5.83437	2.24449	2.0154e-60	1.91571e-58
IL6	0.362467	2.11159	2.54241	9.25076e-31	4.53706e-30
THBS1	1.08446	7.79401	2.84539	1.71149e-31	8.85312e-31
APOBEC3G	0.528662	2.11737	2.00185	1.24173e-60	1.22984e-58
HOXD9	0.535329	2.75892	2.36561	7.89233e-33	4.45157e-32
AL162231.2	0.434759	1.79058	2.04214	1.25368e-35	8.4997e-35
DPYD	1.12212	6.16193	2.45715	1.96204e-64	5.34391e-62
S100A8	2.57959	14.8477	2.52503	6.88137e-31	3.3994e-30
CFAP77	0.446221	1.80253	2.0142	8.37457e-20	2.31477e-19
RNA5-8SP6	0.0323315	4.11521	6.99188	2.22195e-28	9.53043e-28
LTF	0.829262	95.09	6.84132	4.05704e-60	3.70708e-58
IGHG1	1.79822	9.27878	2.36736	1.46348e-24	5.16505e-24
PLP2	6.55633	45.3064	2.78876	6.1361e-59	4.57398e-57
LHX5-AS1	5.68718	0.546618	-3.37911	8.64854e-44	1.0792e-42
IGKC	2.51562	13.9033	2.46644	5.40873e-21	1.58929e-20
MMP14	9.98541	41.9443	2.07058	1.23726e-54	5.04993e-53
FABP5	1.4565	24.9289	4.09724	3.28942e-56	1.69411e-54
PDCD1LG2	0.467311	2.29894	2.29852	1.74836e-61	2.08084e-59
TYMP	2.57396	10.8053	2.06967	1.85528e-49	4.1315e-48
SPP1	177.531	1062.57	2.58142	6.71725e-49	1.39701e-47
C6orf15	0.00548133	3.15533	9.16905	3.21032e-54	1.26651e-52
MAP3K7CL	0.53933	2.96716	2.45984	6.02941e-52	1.80538e-50
CXCL9	0.236691	2.29509	3.27747	6.14959e-50	1.43487e-48
FP671120.3	0.0163832	2.47583	7.23955	3.53051e-29	1.58286e-28
PDLIM4	1.09469	12.7127	3.53768	7.10394e-48	1.29489e-46
C21orf62	1.99803	8.67667	2.11856	2.94534e-44	3.85535e-43
HJURP	0.797717	3.285	2.04195	3.41794e-33	1.97022e-32
CHRNA9	0.0913829	2.32205	4.66733	2.57407e-49	5.5744e-48
FTH1P4	0.310164	1.77362	2.5156	3.27235e-30	1.55212e-29
RARRES1	0.419154	4.10387	3.29143	4.04099e-31	2.03385e-30
ITGA5	2.09	8.43813	2.01342	1.66141e-61	1.99411e-59
SAA2	0.0172147	2.80063	7.34597	5.97823e-33	3.39493e-32
SLC47A2	0.341078	2.41894	2.8262	7.19558e-48	1.30991e-46
OTOS	0.444755	6.26886	3.81712	1.12275e-44	1.53786e-43
IGLC3	0.637589	4.74689	2.89629	9.79401e-24	3.30583e-23
TEKT1	0.348495	2.16973	2.6383	3.14259e-20	8.8928e-20
METTL1	3.7652	16.9347	2.16918	2.06352e-27	8.40541e-27
FTH1P11	0.860109	5.11115	2.57106	5.98014e-32	3.17811e-31
AL354919.2	0.543434	4.2168	2.95597	2.14421e-42	2.34144e-41
PKIB	0.861635	5.0784	2.55922	1.3795e-44	1.87144e-43
IGLC2	1.17716	7.93238	2.75244	2.47464e-22	7.77641e-22
SEC61G	15.0352	207.738	3.78834	2.91115e-40	2.71611e-39
TREM1	0.163027	2.3695	3.8614	2.26595e-52	7.14759e-51
EEF1AKMT3	2.17312	9.85107	2.18051	2.56605e-33	1.48764e-32
AC016700.2	0.478883	1.95263	2.02767	4.5947e-17	1.11296e-16
ABCC3	0.31241	5.42371	4.11777	3.44172e-59	2.6783e-57
RPL24P8	0.7869	4.47398	2.50731	5.71422e-17	1.37801e-16
SERPINE1	5.13881	50.831	3.3062	2.63791e-50	6.43042e-49
SPRY4	3.28332	13.7923	2.07064	1.4965e-31	7.78081e-31
CASP4	0.605377	2.82203	2.22083	1.26123e-65	4.46572e-63
PSPHP1	11.5368	51.7773	2.16608	4.93575e-16	1.14075e-15
YBX1P1	0.790476	4.34649	2.45906	6.841e-29	3.02684e-28
RHOD	0.29385	2.03727	2.79349	5.11166e-29	2.27662e-28
SERPINA5	0.159072	3.06694	4.26904	1.08563e-63	2.26115e-61
CFI	2.98602	12.3042	2.04285	3.87943e-42	4.14362e-41
LINC02308	0.472957	1.90266	2.00824	5.78286e-30	2.69949e-29
PI3	0.453679	18.3537	5.33826	3.18959e-28	1.35414e-27
CYTL1	3.3332	14.117	2.08246	6.98351e-49	1.44813e-47
PCLAF	0.856681	3.46264	2.01504	7.16702e-34	4.27216e-33
F13A1	1.91402	18.7299	3.29066	4.94816e-30	2.31902e-29
EMILIN3	1.19512	10.2188	3.09599	7.3563e-46	1.10368e-44
MFAP2	0.431912	2.6697	2.62787	1.26816e-41	1.30151e-40
CXCL11	0.200456	2.23489	3.47884	9.34121e-47	1.50855e-45
AC010970.1	0.638043	12.0071	4.23409	2.02408e-17	4.98905e-17
INA	36.4254	8.76959	-2.05436	1.38589e-53	4.98182e-52
HSPB1P1	0.961082	4.42439	2.20275	7.05668e-50	1.64111e-48
GOLT1A	0.287659	2.00718	2.80274	9.02907e-08	1.39697e-07
PFN1P1	0.360487	2.76823	2.94095	5.23532e-35	3.37957e-34
GBP1P1	0.350062	2.50171	2.83723	2.81438e-49	6.05776e-48
AL139095.2	0.336795	2.76842	3.03912	7.2515e-16	1.6624e-15
NOG	11.8901	2.64431	-2.1688	2.63832e-72	5.33807e-69
VAV3	0.258025	2.31062	3.1627	3.15488e-56	1.63075e-54
CCNB1	3.43769	14.247	2.05115	6.92536e-41	6.76908e-40
CCDC8	0.627902	3.743	2.57558	2.34469e-39	2.02118e-38
RPS3AP6	1.717	10.5704	2.62208	1.03919e-13	2.14393e-13
SPOCD1	1.3942	9.97995	2.83959	5.82548e-44	7.38641e-43
CD248	1.79519	11.3226	2.65699	4.03614e-52	1.2454e-50
VEGFA	3.03322	19.2711	2.66751	2.5384e-34	1.55701e-33
ABCC8	8.46719	1.91667	-2.14328	7.06872e-54	2.63459e-52
IGHV4-39	0.185742	2.2842	3.62032	4.15036e-21	1.2282e-20
VASN	1.11924	7.92719	2.8243	1.89706e-56	1.01389e-54
HOXB7	0.27909	3.04211	3.44627	2.76502e-41	2.77738e-40
PTMAP4	0.654017	2.62077	2.00259	1.89907e-36	1.35159e-35
LSP1	0.948835	5.19566	2.45308	3.94211e-59	3.05093e-57
AL033519.2	0.367964	2.17636	2.56428	8.82327e-17	2.10839e-16
MYBL2	2.28873	12.407	2.43853	5.42238e-34	3.26103e-33
RGS16	2.99727	12.4691	2.05664	5.56464e-52	1.67329e-50
HOXC10	0.125353	3.23618	4.69023	1.63436e-55	7.58932e-54
FTLP3	2.01416	30.4171	3.91663	6.12997e-48	1.1246e-46
SRPX2	1.0915	10.1145	3.21205	3.31544e-54	1.30073e-52
CD52	0.940904	4.14386	2.13886	8.9407e-37	6.49037e-36
SMIM3	5.21686	23.8974	2.1956	3.93264e-54	1.53438e-52
RAB32	3.90983	16.2412	2.05448	3.11945e-66	1.38065e-63
MIR4435-2HG	0.330285	2.76973	3.06796	2.16554e-50	5.35264e-49
RBP1	2.51968	25.3533	3.33086	9.79948e-47	1.58075e-45
OTX1	0.352529	1.73886	2.30233	5.26463e-28	2.20862e-27
AEBP1	15.405	87.8689	2.51195	1.28692e-50	3.27816e-49
HTRA3	0.382699	2.10814	2.46169	3.87734e-46	5.982e-45
JCHAIN	0.32315	4.34369	3.74865	2.25621e-19	6.10521e-19
COL5A2	2.06756	13.3824	2.69433	5.0196e-50	1.18488e-48
AL022313.4	11.1745	1.94748	-2.52053	3.24988e-59	2.54298e-57
NTS	0.0778009	2.66965	5.10072	0.000200595	0.000261172
NOS2	0.722013	5.00222	2.79247	4.11659e-07	6.15403e-07
RPS2P7	0.462841	2.12247	2.19715	2.83546e-26	1.09424e-25
SOCS2-AS1	0.344807	1.89531	2.45857	9.8685e-41	9.56657e-40
TTR	0.0234946	168.427	12.8075	1.5312e-12	2.98834e-12
IGLV2-23	0.265662	2.91474	3.4557	2.75057e-19	7.40895e-19
AC010422.3	0.370937	2.54187	2.77665	8.64184e-25	3.08531e-24
SPINK8	1.43844	5.95728	2.05015	1.06426e-32	5.95305e-32
FAUP1	0.896846	4.3082	2.26415	1.61096e-15	3.62677e-15
RPS7P10	0.658087	2.92025	2.14974	7.23904e-20	2.00796e-19
CLEC18B	0.34255	1.82453	2.41314	1.49764e-50	3.80126e-49
TNFAIP6	0.561852	7.25695	3.6911	9.11102e-57	5.00152e-55
CHI3L1	8.32183	755.384	6.50417	2.89164e-64	7.36785e-62
CLEC5A	0.219495	2.74163	3.64277	9.19821e-62	1.19518e-59
CHGB	39.214	8.9731	-2.12769	2.68981e-57	1.55493e-55
LIF	0.32312	4.45791	3.78623	4.64209e-44	5.92839e-43
G0S2	0.612041	8.61801	3.81566	4.14556e-52	1.27638e-50
CXCL13	0.543748	2.54189	2.22489	0.030104	0.0340111
FTLP2	0.506514	5.09263	3.32974	2.80549e-47	4.78149e-46
RAB42	0.469825	2.93783	2.64455	4.56607e-63	8.3986e-61
RPS10P3	0.406872	2.96503	2.8654	3.15507e-20	8.92635e-20
SPRY1	2.05838	9.42959	2.19568	8.94101e-52	2.59491e-50
DES	0.498156	3.7048	2.89472	1.31279e-43	1.59324e-42
S100A4	2.60397	22.9588	3.14026	3.43221e-64	8.10172e-62
SFRP4	1.7034	11.2457	2.72288	8.67854e-62	1.13809e-59
RPS29P5	0.726363	3.40056	2.22701	9.71284e-19	2.55573e-18
NAMPTP1	0.605677	2.74899	2.18228	1.87804e-36	1.33796e-35
SLC7A3	0.533141	2.64775	2.31217	7.4932e-10	1.28731e-09
MARCO	0.32069	3.05479	3.25182	9.93165e-17	2.36725e-16
TGFBI	4.33656	22.0571	2.34662	1.41382e-31	7.36447e-31
KCNJ11	11.0632	2.72097	-2.02358	2.72801e-48	5.20711e-47
GAPDHP65	0.657144	4.32036	2.71687	7.47719e-33	4.22247e-32
SERPINA3	0.306295	2.21078	2.85156	7.19726e-51	1.88419e-49
ACTBP2	0.297392	2.84625	3.25862	5.10559e-37	3.77601e-36
RRM2	1.60071	8.14022	2.34635	1.53409e-38	1.24726e-37
AC010343.1	1.7851	9.6261	2.43094	2.28291e-20	6.49514e-20
LINC01602	13.8049	2.36464	-2.54548	4.03604e-18	1.02921e-17
IGHA1	2.15307	16.3037	2.92073	4.64514e-21	1.37146e-20
C7orf57	0.186208	2.76597	3.8928	2.15507e-43	2.58008e-42
ANXA1	6.75782	58.3526	3.11017	5.16865e-64	1.14381e-61
FAM129A	1.10384	4.77527	2.11306	3.01907e-60	2.79472e-58
CUX2	3.59538	0.863725	-2.0575	7.19244e-55	3.04079e-53
APOL4	1.23086	8.47393	2.78337	1.15021e-52	3.70238e-51
TROAP	0.760613	3.15497	2.05239	7.71761e-33	4.3565e-32
COX7CP1	0.505446	2.39778	2.24607	5.96866e-23	1.92648e-22
AC096537.1	0.428501	1.80921	2.07799	1.48935e-18	3.87679e-18
CARD16	0.654248	3.79746	2.53712	1.52046e-60	1.47495e-58
FOLR1	0.685107	3.53288	2.36644	2.26598e-29	1.02436e-28
PCOLCE	1.924	16.2895	3.08176	1.49337e-53	5.34105e-52
SLPI	5.92166	25.7906	2.12277	4.36346e-10	7.59209e-10
NME2P1	0.45787	2.61394	2.51321	1.03118e-32	5.77941e-32
RNASE2	1.89536	9.43983	2.31629	8.03096e-46	1.19981e-44
PINLYP	0.466644	2.84912	2.61012	2.42316e-47	4.1599e-46
RPS2P55	0.422167	1.72505	2.03076	9.0856e-25	3.23966e-24
SOCS3	4.61471	27.7952	2.59053	1.10133e-43	1.35166e-42
CP	1.78994	8.072	2.17301	1.76598e-44	2.37527e-43
AC053503.1	12.6452	2.8173	-2.1662	2.54416e-58	1.70772e-56
PLAT	2.3219	13.9571	2.58763	3.02388e-64	7.36785e-62
PLA2G2A	0.165998	21.7462	7.03345	1.12323e-53	4.10009e-52
GBP1	3.06581	17.7197	2.53101	1.15067e-59	9.7006e-58
AMER3	2.70766	0.550582	-2.29802	2.33954e-55	1.05525e-53
HOXA5	0.190262	3.96079	4.37973	1.10251e-56	6.00569e-55
IBSP	0.403279	7.69606	4.25427	6.60543e-44	8.34547e-43
SCRT1	10.2983	2.34542	-2.13449	1.99599e-55	9.11909e-54
TAGLN2	19.5274	134.194	2.78074	2.52811e-63	4.8386e-61
GJB2	0.719162	4.49805	2.64491	1.12538e-27	4.64418e-27
FN1	16.645	66.7509	2.0037	1.11922e-46	1.79927e-45
RPS18P12	0.691355	7.33998	3.40828	9.92327e-20	2.73006e-19
RDH10	2.56434	11.1824	2.12457	2.36845e-53	8.26214e-52
COL6A3	0.217359	4.08084	4.23072	3.6607e-39	3.1214e-38
RPS29P16	0.630662	2.52283	2.0001	6.26781e-25	2.25364e-24
CA9	0.669148	6.62467	3.30745	2.86229e-18	7.35594e-18
FLNC	3.09853	17.0253	2.45803	4.95421e-50	1.17139e-48
SLC17A8	2.84572	0.586873	-2.27767	1.36664e-12	2.67454e-12
COL5A1	0.533705	5.77276	3.43515	1.02524e-44	1.41113e-43
RPL37P2	0.587695	3.38305	2.52518	5.97448e-17	1.43902e-16
AP002784.2	0.404867	1.98834	2.29605	6.08244e-39	5.11858e-38
TUBA1C	2.05716	15.687	2.93085	4.63398e-63	8.41424e-61
LHX5	2.05324	0.267255	-2.94161	7.68394e-38	5.96316e-37
BCAT1	1.39403	7.96526	2.51446	1.24787e-51	3.57042e-50
FBLIM1	1.15567	4.83861	2.06586	1.05084e-30	5.13739e-30
KCNE5	1.43131	6.99772	2.28955	1.12599e-12	2.21154e-12
MMP9	0.71406	12.913	4.17664	2.10112e-35	1.40038e-34
CDC42P6	0.440955	2.65226	2.58852	1.26378e-39	1.11798e-38
RPS19P1	0.209049	2.00374	3.26078	2.01722e-25	7.44009e-25
AC073861.1	5.70761	27.5334	2.27022	2.58337e-17	6.33015e-17
UBE2C	4.79187	20.9134	2.12577	3.84393e-34	2.32955e-33
FOXJ1	2.93139	16.7973	2.51857	1.32164e-38	1.0795e-37
MSR1	1.40329	7.65965	2.44846	1.7825e-60	1.70578e-58
LUM	0.802284	11.2108	3.80464	2.54987e-47	4.36157e-46
GPNMB	4.62795	20.9126	2.17592	5.49662e-48	1.01365e-46
RARRES2	1.63488	24.074	3.88021	1.92926e-49	4.27607e-48
AGAP2-AS1	0.712958	12.7221	4.15738	2.24346e-53	7.90403e-52
H3F3AP4	5.13153	31.0108	2.59531	5.163e-26	1.96358e-25
AL035446.1	0.778686	5.63952	2.85646	4.22749e-35	2.74651e-34
FAM183A	0.10909	4.03263	5.20813	2.47807e-50	6.07214e-49
XKR7	2.06299	0.400303	-2.36557	3.7835e-47	6.38685e-46
EFHC2	0.47526	1.90124	2.00015	8.48338e-31	4.16898e-30
NEK2	0.679082	2.74483	2.01506	4.31546e-33	2.4785e-32
GPX1P1	1.76619	11.6545	2.72217	3.23362e-32	1.75269e-31
ADAM12	0.230194	2.64659	3.52321	3.45176e-62	4.9381e-60
WISP1	0.167643	2.94054	4.13262	4.49011e-50	1.067e-48
MXRA5	0.589172	3.22861	2.45415	1.18229e-36	8.51282e-36
HNRNPKP4	0.399398	1.6317	2.03048	1.9929e-26	7.74361e-26
DPEP1	0.397679	2.48378	2.64286	1.15761e-32	6.4599e-32
FAM110C	0.375223	1.79569	2.25872	2.50301e-29	1.12826e-28
ESM1	0.397389	3.18336	3.00193	1.84553e-39	1.61248e-38
SNRPEP4	0.696895	4.79759	2.7833	5.23122e-21	1.53937e-20
FGFBP2	1.0022	8.22354	3.03659	4.46674e-26	1.70657e-25
TMSB4XP1	0.633891	9.20635	3.86032	2.55787e-50	6.24606e-49
DDIT4L	0.386439	5.58507	3.85326	4.82204e-56	2.41324e-54
CEP55	0.535659	2.20682	2.04258	6.35555e-43	7.2709e-42
AC074351.1	0.435718	9.57365	4.4576	9.85261e-08	1.52173e-07
HOXD13	0.146259	2.10005	3.84383	4.29235e-47	7.21146e-46
DLGAP5	0.546296	2.73838	2.32557	5.36482e-40	4.91475e-39
RPL41P2	1.25118	5.00651	2.00051	3.80852e-24	1.31433e-23
IGLV3-25	0.185728	2.3025	3.63194	1.27785e-16	3.03204e-16
C1RL	1.64564	6.61569	2.00724	4.04219e-57	2.28086e-55
CTHRC1	0.861798	6.76094	2.9718	5.63096e-41	5.52295e-40
MYBPH	0.16503	2.70618	4.03545	1.55374e-60	1.49698e-58
PHLDA2	0.249643	2.45948	3.30042	6.54495e-41	6.40167e-40
TMSB4XP8	10.7052	147.46	3.78394	1.66415e-50	4.18639e-49
OSMR	1.66137	8.48669	2.35283	1.44651e-61	1.7971e-59
CLCF1	0.539678	3.62725	2.74871	7.71998e-52	2.26373e-50
HK3	0.45416	1.89809	2.06327	2.4512e-32	1.3404e-31
FCGR3A	13.4219	54.1345	2.01196	5.50198e-50	1.29228e-48
MEOX2	0.15378	9.93098	6.013	8.53201e-40	7.66258e-39
KIAA0040	1.69645	9.01091	2.40915	7.7653e-63	1.26414e-60
MCUB	1.12225	8.21411	2.87171	1.3877e-63	2.80772e-61
ELDR	0.0117982	4.63449	8.6177	5.51435e-31	2.74323e-30
NKX2-5	0.0607675	2.05578	5.08024	2.28554e-51	6.32228e-50
GZMA	0.367057	1.66735	2.18348	3.79636e-42	4.05795e-41
FMOD	1.05549	27.2326	4.68936	9.82592e-60	8.3834e-58
COL6A2	3.30349	43.2303	3.70998	1.27846e-50	3.26248e-49
FAM181A-AS1	0.433393	1.74376	2.00846	3.81821e-47	6.43778e-46
ASF1B	1.62405	7.53436	2.21388	2.79818e-41	2.8067e-40
RPL5P34	0.513023	3.6407	2.82712	1.07018e-24	3.8054e-24
CD48	0.385885	1.76463	2.19312	6.9377e-44	8.7341e-43
IGLV3-21	0.252477	2.4244	3.2634	2.45481e-17	6.02346e-17
RSPH4A	0.47851	2.02695	2.08269	6.16961e-32	3.27512e-31
MET	0.884856	3.92061	2.14756	3.12765e-22	9.77641e-22
AL591846.1	0.936405	11.6643	3.63882	1.15151e-17	2.87582e-17
CCL18	0.376846	6.57924	4.12588	3.98542e-10	6.9497e-10
ACTG2	0.399318	2.5014	2.64712	1.25796e-29	5.76586e-29
SLN	4.04813	19.6636	2.2802	6.27536e-19	1.66563e-18
SLC2A10	1.29756	5.57379	2.10286	5.25341e-63	9.41823e-61
H19	0.278795	13.0976	5.55395	3.4824e-36	2.4477e-35
SAA1	0.0893641	37.2368	8.70282	4.46389e-45	6.3033e-44
ANXA2	4.33528	33.1273	2.93382	2.19043e-62	3.33581e-60
CHODL	0.324095	2.60394	3.00621	1.25467e-23	4.20588e-23
AVIL	1.49097	6.14282	2.04265	3.30464e-09	5.49338e-09
IL1RAP	1.34927	5.41318	2.0043	1.94776e-39	1.69448e-38
AC104051.2	20.058	2.73362	-2.87529	4.38611e-12	8.38108e-12
NAMPT	5.7744	33.3671	2.53068	1.00018e-54	4.14197e-53
WDR38	0.29609	2.94213	3.31275	1.49806e-34	9.34259e-34
SKA1	0.431373	2.00077	2.21355	1.01178e-37	7.80068e-37
HOXB2	0.18652	3.16904	4.08664	4.41113e-45	6.24125e-44
S100A11	32.6178	165.647	2.34437	3.13277e-63	5.91592e-61
C1R	9.6959	42.3368	2.12647	3.95798e-57	2.24227e-55
KIF2C	1.43385	5.79143	2.01402	3.98121e-44	5.12599e-43
UBE2SP1	0.391105	1.72992	2.14508	2.59797e-31	1.3269e-30
TACC3	2.19278	8.99127	2.03577	9.3121e-36	6.39298e-35
STEAP3	1.83801	15.3464	3.06169	1.41825e-66	6.69555e-64
IGLV3-19	0.21431	2.41101	3.49187	2.06508e-20	5.89552e-20
HS3ST3B1	0.179811	1.94299	3.43373	1.74432e-44	2.34836e-43
ADAM33	0.474408	2.64737	2.48036	5.26034e-26	1.99952e-25
B3GNT7	0.526383	2.89216	2.45796	2.71737e-51	7.44411e-50
CYTOR	0.345155	3.77559	3.45139	2.11131e-54	8.39956e-53
CYP27B1	0.267597	2.49114	3.21867	2.91393e-27	1.17545e-26
RTP5	18.1798	3.46335	-2.3921	3.09593e-66	1.38065e-63
TRIM67	8.71189	1.02095	-3.09307	1.58075e-40	1.50661e-39
PDPN	2.47246	54.3114	4.45723	9.40931e-74	3.3316e-70
TIMP1	10.0844	202.222	4.32574	6.74444e-66	2.72919e-63
RPS2P32	0.356528	2.17308	2.60765	2.48571e-47	4.26212e-46
LOX	0.511306	6.29309	3.62151	3.15007e-50	7.6264e-49
SERPINA1	2.55768	13.2163	2.36941	1.73437e-58	1.21603e-56
IL13RA2	1.0293	12.0135	3.54492	1.52642e-39	1.34113e-38
CCL5	1.02937	4.31282	2.06686	1.35301e-46	2.16039e-45
HMGN1P38	0.261369	1.88209	2.84817	7.09386e-33	4.0156e-32
CD58	1.69729	7.93062	2.2242	6.07327e-68	3.73981e-65
SNRPGP10	1.44114	14.6167	3.34233	1.80096e-38	1.45838e-37
CXCL10	0.817086	14.5538	4.15476	3.27044e-54	1.28664e-52
CDCA8	1.29528	5.93627	2.19629	9.63054e-46	1.43124e-44
GPX8	0.22989	3.54038	3.94489	3.44013e-61	3.86688e-59
H3F3AP6	0.261124	2.18897	3.06745	1.51729e-25	5.63285e-25
IGFBP2	3.46777	72.4665	4.38523	1.35247e-58	9.67425e-57
AC008080.4	0.266385	1.82836	2.77897	1.90509e-11	3.52335e-11
SOCS2	1.22887	7.12396	2.53535	3.27309e-45	4.71105e-44
MTCO2P2	1.29521	5.7266	2.14449	8.97676e-16	2.04698e-15
SERPINH1	5.06647	25.8737	2.35243	7.6648e-62	1.03163e-59
2021-09-14	0.00813461	4.37626	9.07141	3.63078e-35	2.37628e-34
FTH1P12	0.462752	2.14823	2.21484	2.76461e-29	1.245e-28
RPSAP12	0.38334	1.73364	2.17711	5.14106e-16	1.18762e-15
AC025458.1	0.448667	1.9488	2.11887	4.58883e-20	1.28824e-19
EMILIN2	0.578342	3.48109	2.58955	1.31871e-59	1.09864e-57
NPNT	1.47553	8.69297	2.55862	7.46828e-36	5.15213e-35
STEAP1	0.511072	2.50337	2.29227	1.38249e-28	6.01358e-28
COL1A2	3.06844	39.5217	3.68707	4.55863e-51	1.21819e-49
FOXD3-AS1	0.905434	3.72607	2.04097	1.166e-38	9.56225e-38
CACNG2	4.20645	0.712752	-2.56113	7.83424e-56	3.79987e-54
TRDC	0.482432	5.20747	3.43218	8.68414e-34	5.15912e-33
MAP1LC3C	0.114257	2.3429	4.35793	1.05057e-60	1.05527e-58
FSTL1	5.77589	26.4509	2.1952	1.2426e-69	1.25707e-66
RNU4-2	4.69737	22.3486	2.25026	5.54199e-07	8.23795e-07
AC136632.1	2.20649	9.03024	2.03301	1.21684e-14	2.63236e-14
IGF2BP2	0.272406	3.08371	3.50084	2.70467e-55	1.2046e-53
RNU4-1	1.32987	8.46375	2.67001	1.25797e-08	2.03269e-08
AMIGO2	0.702232	2.88401	2.03806	6.91632e-47	1.13375e-45
MMP19	0.312386	2.0007	2.67911	1.51147e-35	1.02084e-34
LINC01579	0.319093	2.35244	2.88211	1.31435e-41	1.34697e-40
PLAU	1.72276	12.4459	2.85287	1.07052e-53	3.92793e-52
FAM83D	0.783547	3.30504	2.07658	6.76168e-36	4.67378e-35
TNFRSF12A	3.59622	30.7261	3.09491	6.179e-63	1.04182e-60
HOXA10	0.298641	1.93716	2.69746	5.59362e-44	7.10515e-43
IGHM	0.731671	3.17347	2.11679	9.35793e-25	3.33509e-24
COL8A1	0.165434	3.1561	4.25382	3.02388e-64	7.36785e-62
AC122707.1	3.04483	0.57965	-2.39311	1.7969e-51	5.01963e-50
SERPING1	10.3391	53.8097	2.37976	1.27225e-59	1.06621e-57
IGKV4-1	0.431571	4.95151	3.5202	3.4332e-22	1.07079e-21
FTH1P8	2.16531	9.42566	2.12202	4.07089e-29	1.82052e-28
TRAC	0.412715	2.16038	2.38807	1.53705e-48	3.01096e-47
LOXL2	2.00083	8.35795	2.06255	6.009e-42	6.3041e-41
LGALS3	8.0087	59.7816	2.90006	1.14481e-49	2.59839e-48
LINC02587	0.187872	6.66297	5.14834	3.78285e-39	3.22168e-38
METTL7B	4.99969	63.2364	3.66084	1.1004e-58	7.95155e-57
STAC	0.113426	2.29393	4.338	1.8037e-54	7.23679e-53
NCAPG	0.739544	2.99964	2.02008	2.31583e-34	1.42419e-33
AL031727.1	0.792085	3.59734	2.1832	6.63379e-21	1.9376e-20
RPL12P4	0.726535	4.87252	2.74557	2.51309e-21	7.52016e-21
KCNK3	4.8066	1.18432	-2.02096	2.48865e-45	3.5966e-44
HOTAIRM1	0.45999	4.89088	3.41042	5.35883e-50	1.26285e-48
IGKV1-5	0.303563	4.30249	3.8251	2.51437e-23	8.29899e-23
ARSJ	0.462049	2.49939	2.43546	8.78254e-44	1.09399e-42
AQP5	0.148621	2.57198	4.11317	1.50216e-47	2.6396e-46
AC064875.1	0.162878	2.11624	3.69964	2.07058e-45	3.02326e-44
DMRTA2	0.174613	3.93906	4.49562	4.9697e-47	8.32969e-46
GDF15	0.361455	5.31824	3.87906	1.59652e-51	4.48642e-50
CSTA	0.380287	2.07417	2.44738	1.22464e-48	2.43947e-47
CRNDE	0.737866	4.15204	2.49239	1.22431e-58	8.80201e-57
POSTN	0.321299	26.8689	6.38588	8.57152e-47	1.39059e-45
MIR6071	4.70005	1.07861	-2.1235	3.29012e-48	6.24638e-47
IGF2	4.86522	19.5529	2.0068	1.92011e-08	3.07804e-08
SNHG18	0.568165	2.8516	2.32739	2.23175e-35	1.48396e-34
TEX26	0.420026	2.36665	2.49429	6.71161e-43	7.67203e-42
KDELR3	0.491123	3.61988	2.88178	6.14087e-51	1.6136e-49
SOCS1	0.560205	2.85589	2.34991	5.68812e-46	8.61613e-45
IGLV1-40	0.308299	3.35636	3.4445	3.18738e-22	9.95652e-22
RPS11P5	1.54577	6.55497	2.08426	1.37707e-22	4.36806e-22
TWIST1	0.608788	2.89285	2.24848	1.57015e-32	8.66641e-32
TSTD1	1.5726	8.73743	2.47406	2.56747e-38	2.06374e-37
IGHV5-51	0.37489	2.00809	2.42128	7.1077e-16	1.6297e-15
TEAD3	0.837289	3.717	2.15034	7.31841e-52	2.15939e-50
ALOX5AP	7.36646	33.5736	2.18828	1.10781e-57	6.82169e-56
HMGA1P7	2.19065	0.433585	-2.33697	5.51263e-53	1.82846e-51
SVOP	6.8618	1.65399	-2.05264	5.90379e-41	5.78653e-40
FP671120.4	0.414872	5.97613	3.84847	1.22284e-28	5.33057e-28
OASL	0.556074	2.3593	2.08501	8.65439e-43	9.81362e-42
IGFBP3	9.74692	54.3563	2.47943	2.04439e-30	9.82179e-30
LGALS1	60.3139	270.315	2.16408	4.05636e-59	3.12229e-57
HAMP	1.12479	4.86317	2.11224	2.85482e-39	2.44751e-38
FCGBP	5.71085	26.4295	2.21037	5.94325e-45	8.29302e-44
AC104692.1	1.20801	6.02372	2.31802	1.04442e-13	2.15439e-13
HLA-DQA1	2.45656	10.367	2.07728	3.82888e-46	5.91368e-45
PLBD1	0.666256	3.25626	2.28907	5.8898e-68	3.73981e-65
RPL34P18	0.366523	2.53186	2.78822	9.76513e-17	2.32834e-16
RPLP0P6	4.91083	23.2594	2.24378	1.35599e-14	2.92401e-14
KCNIP2	24.9135	5.57626	-2.15956	3.49103e-55	1.52603e-53
ADM	2.12574	13.912	2.71029	3.88824e-43	4.55871e-42
CDC20	2.2542	12.3551	2.45442	3.27165e-46	5.07518e-45
CDK4	26.44	105.966	2.0028	1.21473e-11	2.26729e-11
BIRC5	2.48476	11.8219	2.25029	3.72178e-34	2.25939e-33
PDLIM1	2.07976	11.7564	2.49895	2.82781e-51	7.68718e-50
IGLV1-47	0.429998	2.47536	2.52524	2.25154e-16	5.28044e-16
HOXD10	0.146284	2.0903	3.83687	1.72331e-42	1.90236e-41
AQP1	74.6489	324.286	2.11907	1.83566e-34	1.13729e-33
PLEKHA4	5.01264	20.3582	2.02197	2.42438e-59	1.95093e-57
FKBP9	5.28606	23.8443	2.17338	9.33538e-63	1.50247e-60
IGKV3-11	0.405293	2.73804	2.7561	5.99316e-12	1.13721e-11
TUBAP2	0.559404	4.26078	2.92916	1.81011e-44	2.4277e-43
TMSB10P1	0.321408	3.82408	3.57264	5.60756e-43	6.47269e-42
COL4A2	8.1486	40.3258	2.30708	2.60301e-49	5.62847e-48
RAB34	2.41224	15.9295	2.72325	3.65235e-58	2.37285e-56
AC012213.4	3.26693	0.533928	-2.61322	1.29498e-63	2.65809e-61
FBXO17	0.706426	4.35731	2.62483	1.15558e-47	2.04836e-46
PRF1	0.362333	1.79388	2.30769	1.85541e-46	2.9198e-45
MMP7	0.2887	2.77504	3.26486	4.03327e-31	2.03069e-30
SOD2	12.6576	57.2284	2.17673	9.8654e-55	4.12164e-53
HLA-DRA	137.546	559.674	2.02467	1.85403e-52	5.87443e-51
LDHAP4	0.687734	3.51856	2.35506	2.90282e-46	4.51787e-45
NNMT	0.839548	25.8189	4.94267	8.15216e-60	7.1271e-58
HP	0.0519633	2.47762	5.57532	1.8905e-39	1.64973e-38
SNAI1	0.447535	1.83806	2.03811	2.48094e-38	1.99645e-37
CCNB2	1.49186	6.40965	2.10314	2.18298e-37	1.64718e-36
MELK	0.919208	4.3316	2.23644	1.23362e-37	9.46975e-37
SPON2	0.492734	2.29116	2.2172	2.96933e-41	2.96786e-40
L1CAM	17.7011	4.21868	-2.06898	9.31674e-30	4.30095e-29
GAPDHP63	0.278389	1.80852	2.69963	1.59217e-31	8.26006e-31
TNFRSF11B	0.341562	2.91655	3.09404	4.69217e-64	1.07186e-61
BCL2A1	1.24302	5.04083	2.01981	7.46059e-35	4.76824e-34
SUMO2P1	0.663156	2.95667	2.15655	6.36331e-21	1.8609e-20
TMSB4XP2	0.299547	5.563	4.21501	4.43389e-43	5.17702e-42
LINC02440	4.02874	0.978133	-2.04223	4.69185e-60	4.23252e-58
AC062021.1	12.3234	1.35006	-3.1903	1.65216e-61	1.99411e-59
RANP1	0.266932	1.98393	2.89382	1.17585e-29	5.40173e-29
CHRNA1	0.229155	3.85395	4.07194	1.14272e-34	7.20586e-34
DIRAS3	1.922	11.9333	2.63431	1.68579e-58	1.18785e-56
GPR65	0.509231	2.1041	2.04681	1.9282e-55	8.8666e-54
KIF23	0.456065	2.06043	2.17564	5.38148e-40	4.92363e-39
LAMB1	2.71296	11.1543	2.03966	2.08664e-37	1.57785e-36
