# Supplementary material for: Molecular Subtypes and Prognostic Signature of Pyroptosis-Related lncRNAs in Glioma Patients
Source: Front Oncol. 2022 Feb 14;12:779168. doi: 10.3389/fonc.2022.779168 (PMC8884250; doi:10.3389/fonc.2022.779168)
Supplement: Supplementary file 7 [file Table_3.xlsx]

## Sheet: Sheet1
Table S3 Molecular subtypes of TCGA and CGGA
TCGA		CGGA
ID	Cluster	ID	Cluster
TCGA-06-0129	1	CGGA_1114	1
TCGA-06-5416	1	CGGA_710	1
TCGA-32-1970	1	CGGA_1698	1
TCGA-19-1787	1	CGGA_1227	1
TCGA-06-0184	1	CGGA_1228	1
TCGA-41-5651	2	CGGA_D30	1
TCGA-02-2485	1	CGGA_446	2
TCGA-06-0138	1	CGGA_1697	2
TCGA-06-0747	1	CGGA_1534	2
TCGA-06-5414	1	CGGA_1041	1
TCGA-76-4925	1	CGGA_1408	1
TCGA-06-0221	2	CGGA_276	2
TCGA-19-4065	1	CGGA_P132	2
TCGA-06-0178	1	CGGA_638	2
TCGA-02-0055	1	CGGA_1722	2
TCGA-02-2483	2	CGGA_878	1
TCGA-06-2563	1	CGGA_P100	1
TCGA-06-0139	1	CGGA_251	2
TCGA-28-5209	1	CGGA_1407	2
TCGA-DU-7309	2	CGGA_1156	1
TCGA-QH-A6X5	2	CGGA_1036	1
TCGA-CS-6186	2	CGGA_1321	1
TCGA-DU-7294	2	CGGA_488	2
TCGA-FG-A70Z	2	CGGA_1417	2
TCGA-E1-A7YS	2	CGGA_P110	1
TCGA-DU-5871	2	CGGA_1723	2
TCGA-DB-A75L	2	CGGA_P338	2
TCGA-R8-A6ML	2	CGGA_1651	2
TCGA-FG-5962	2	CGGA_P399	2
TCGA-DU-7304	2	CGGA_P337	2
TCGA-DU-6407	2	CGGA_1418	2
TCGA-DU-A5TT	1	CGGA_P205	2
TCGA-HT-A61A	2	CGGA_1164	2
TCGA-P5-A5EW	2	CGGA_1473	1
TCGA-DU-5870	2	CGGA_1389	2
TCGA-CS-4943	2	CGGA_1446	2
TCGA-HT-7607	2	CGGA_1094	1
TCGA-VV-A86M	2	CGGA_P265	2
TCGA-S9-A7QW	2	CGGA_256	2
TCGA-HW-A5KM	2	CGGA_492	1
TCGA-DH-A7UR	2	CGGA_858	2
TCGA-DB-A64V	2	CGGA_1695	2
TCGA-QH-A65R	2	CGGA_663	2
TCGA-CS-6188	1	CGGA_1459	1
TCGA-TQ-A7RO	2	CGGA_1431	2
TCGA-TM-A84I	2	CGGA_867	1
TCGA-QH-A6X4	2	CGGA_1472	1
TCGA-DU-7301	2	CGGA_909	2
TCGA-FG-A4MT	2	CGGA_1415	1
TCGA-FG-A4MW	2	CGGA_D36	1
TCGA-HW-7490	2	CGGA_P311	1
TCGA-S9-A6WL	2	CGGA_773	2
TCGA-HT-7689	2	CGGA_P335	2
TCGA-DB-5274	2	CGGA_369	2
TCGA-RY-A843	2	CGGA_1467	2
TCGA-S9-A7IX	2	CGGA_1120	2
TCGA-HT-7882	1	CGGA_P160	1
TCGA-QH-A6CZ	2	CGGA_1596	1
TCGA-FG-A87N	2	CGGA_1374	1
TCGA-S9-A6WD	2	CGGA_1523	1
TCGA-QH-A6CS	2	CGGA_1764	1
TCGA-P5-A77W	2	CGGA_1134	1
TCGA-DB-A4XG	2	CGGA_1644	1
TCGA-DB-A64L	2	CGGA_1514	2
TCGA-VM-A8CF	1	CGGA_1045	1
TCGA-TM-A7C3	1	CGGA_157	2
TCGA-CS-6667	2	CGGA_1840	1
TCGA-CS-6666	2	CGGA_1619	1
TCGA-DU-A5TR	1	CGGA_1006	1
TCGA-VM-A8C9	1	CGGA_905	2
TCGA-RY-A83Z	2	CGGA_P175	2
TCGA-S9-A89Z	2	CGGA_705	1
TCGA-DU-6403	2	CGGA_P112	2
TCGA-FG-6688	1	CGGA_D26	1
TCGA-DU-A7TC	2	CGGA_P103	2
TCGA-FG-A4MX	2	CGGA_834	1
TCGA-TM-A7C4	2	CGGA_P308	2
TCGA-28-5220	1	CGGA_666	2
TCGA-76-4929	1	CGGA_1083	1
TCGA-19-2629	1	CGGA_1461	1
TCGA-27-2528	1	CGGA_P421	2
TCGA-06-1804	1	CGGA_1504	2
TCGA-14-0817	1	CGGA_D33	2
TCGA-06-0187	1	CGGA_727	1
TCGA-28-5218	2	CGGA_120	1
TCGA-06-5408	1	CGGA_1437	2
TCGA-28-5204	1	CGGA_1655	1
TCGA-12-0618	2	CGGA_1720	2
TCGA-32-2634	2	CGGA_P270	1
TCGA-28-5207	1	CGGA_P113	2
TCGA-28-5216	1	CGGA_P102	1
TCGA-S9-A6UB	2	CGGA_802	1
TCGA-HT-7473	2	CGGA_1714	2
TCGA-TQ-A7RV	2	CGGA_P22	1
TCGA-DU-A7TD	1	CGGA_P346	1
TCGA-FG-8186	2	CGGA_P177	1
TCGA-DU-8161	1	CGGA_P178	2
TCGA-QH-A6X9	2	CGGA_1669	1
TCGA-S9-A6U9	2	CGGA_1564	1
TCGA-HT-8563	1	CGGA_698	1
TCGA-DB-A64W	2	CGGA_1749	1
TCGA-TQ-A7RN	2	CGGA_1401	2
TCGA-DH-A7UV	2	CGGA_1048	1
TCGA-FG-7637	2	CGGA_D57	1
TCGA-HT-7874	2	CGGA_273	2
TCGA-DB-5280	2	CGGA_818	2
TCGA-E1-A7YD	1	CGGA_D21	2
TCGA-HT-7858	2	CGGA_1066	1
TCGA-HT-7695	2	CGGA_1411	2
TCGA-HT-7480	2	CGGA_1435	1
TCGA-P5-A5F0	2	CGGA_1657	2
TCGA-TM-A84B	1	CGGA_1658	1
TCGA-E1-5322	2	CGGA_P315	2
TCGA-HT-8108	2	CGGA_1704	2
TCGA-19-1389	1	CGGA_1829	2
TCGA-26-5132	1	CGGA_D20	2
TCGA-DB-A75M	2	CGGA_P163	1
TCGA-DU-6410	2	CGGA_1520	1
TCGA-TM-A84S	2	CGGA_1108	1
TCGA-DU-8167	2	CGGA_243	2
TCGA-HT-7879	2	CGGA_1303	2
TCGA-28-2513	1	CGGA_1375	2
TCGA-HT-7608	2	CGGA_309	1
TCGA-S9-A7J2	2	CGGA_1770	1
TCGA-76-4927	1	CGGA_1386	2
TCGA-DU-A7TI	2	CGGA_1260	1
TCGA-HT-8110	1	CGGA_1701	2
TCGA-28-5213	1	CGGA_807	2
TCGA-14-1402	1	CGGA_1538	1
TCGA-06-5858	1	CGGA_825	1
TCGA-41-2572	1	CGGA_1224	1
TCGA-27-2519	1	CGGA_1095	1
TCGA-27-1830	1	CGGA_603	2
TCGA-06-0878	1	CGGA_1118	1
TCGA-06-0646	1	CGGA_1330	1
TCGA-06-0157	1	CGGA_1313	1
TCGA-27-1835	1	CGGA_1694	1
TCGA-27-2524	1	CGGA_1537	1
TCGA-14-1829	1	CGGA_1735	1
TCGA-76-4932	1	CGGA_679	1
TCGA-06-0190	1	CGGA_1404	2
TCGA-06-0645	1	CGGA_883	2
TCGA-QH-A6X3	2	CGGA_337	2
TCGA-WY-A85E	2	CGGA_1051	2
TCGA-HT-7855	2	CGGA_1159	2
TCGA-HT-7854	2	CGGA_1362	1
TCGA-HW-8321	2	CGGA_530	1
TCGA-R8-A6MK	2	CGGA_D47	2
TCGA-HT-7902	2	CGGA_1501	1
TCGA-DU-A7TG	2	CGGA_265	2
TCGA-TQ-A7RJ	2	CGGA_1378	2
TCGA-FN-7833	2	CGGA_1146	1
TCGA-RY-A83Y	2	CGGA_1377	2
TCGA-KT-A74X	2	CGGA_1105	1
TCGA-TM-A84M	2	CGGA_P13	2
TCGA-DU-5852	2	CGGA_1420	2
TCGA-FG-5963	2	CGGA_1680	1
TCGA-06-0649	1	CGGA_P27	2
TCGA-12-0616	1	CGGA_1737	2
TCGA-06-2562	1	CGGA_P128	2
TCGA-DU-6392	2	CGGA_1738	2
TCGA-S9-A7R7	1	CGGA_D52	2
TCGA-HT-8564	2	CGGA_1641	1
TCGA-QH-A6CU	2	CGGA_1131	2
TCGA-DU-6393	2	CGGA_1232	1
TCGA-TQ-A7RP	1	CGGA_1097	1
TCGA-HT-7476	2	CGGA_1271	1
TCGA-DU-5853	2	CGGA_1039	2
TCGA-DB-A64R	2	CGGA_1172	1
TCGA-HT-7604	2	CGGA_659	2
TCGA-TQ-A7RK	2	CGGA_1507	1
TCGA-DB-A64Q	2	CGGA_P356	2
TCGA-FG-A713	2	CGGA_241	2
TCGA-FG-6691	2	CGGA_1300	1
TCGA-FG-A87Q	1	CGGA_1371	1
TCGA-DH-A66G	2	CGGA_1332	1
TCGA-FG-A60L	2	CGGA_1508	1
TCGA-S9-A7R1	2	CGGA_1434	1
TCGA-HT-7474	2	CGGA_1773	1
TCGA-WY-A859	2	CGGA_655	2
TCGA-P5-A737	2	CGGA_1263	1
TCGA-QH-A6X8	2	CGGA_1058	1
TCGA-DU-8166	2	CGGA_1057	1
TCGA-S9-A7IY	2	CGGA_P314	2
TCGA-HT-7481	2	CGGA_1666	2
TCGA-DH-A7UT	2	CGGA_521	1
TCGA-FG-7636	2	CGGA_601	2
TCGA-DU-A6S8	2	CGGA_P16	2
TCGA-DU-5874	2	CGGA_1647	2
TCGA-HT-8018	2	CGGA_1518	1
TCGA-DU-7012	1	CGGA_112	2
TCGA-FG-A6J1	2	CGGA_1767	2
TCGA-S9-A7IS	2	CGGA_1091	1
TCGA-DH-5143	2	CGGA_1137	2
TCGA-P5-A733	2	CGGA_1826	1
TCGA-DH-A66F	2	CGGA_568	1
TCGA-DU-A5TP	2	CGGA_1138	1
TCGA-HT-8105	2	CGGA_1517	2
TCGA-CS-6668	2	CGGA_J023	2
TCGA-HT-7483	2	CGGA_1648	2
TCGA-HT-7694	2	CGGA_1715	1
TCGA-HT-A614	2	CGGA_42	2
TCGA-IK-7675	2	CGGA_1262	2
TCGA-DB-A64S	2	CGGA_1731	1
TCGA-FG-A6J3	1	CGGA_1161	2
TCGA-DU-6397	2	CGGA_P121	2
TCGA-TQ-A7RF	2	CGGA_591	2
TCGA-QH-A6CX	1	CGGA_881	1
TCGA-TM-A84L	1	CGGA_1565	1
TCGA-E1-A7Z2	2	CGGA_269	1
TCGA-DB-A4X9	2	CGGA_1559	2
TCGA-TQ-A7RR	2	CGGA_1682	1
TCGA-DU-5847	1	CGGA_862	2
TCGA-HT-7609	2	CGGA_1422	2
TCGA-E1-A7YI	2	CGGA_848	1
TCGA-DB-A4XB	2	CGGA_1708	1
TCGA-06-0171	1	CGGA_904	2
TCGA-26-5133	1	CGGA_108	1
TCGA-76-4928	1	CGGA_1850	2
TCGA-06-5856	1	CGGA_1055	2
TCGA-19-2619	1	CGGA_1546	1
TCGA-QH-A6CW	2	CGGA_1170	2
TCGA-E1-A7Z6	2	CGGA_1505	1
TCGA-S9-A6TS	2	CGGA_704	2
TCGA-FG-5965	2	CGGA_1101	2
TCGA-S9-A89V	2	CGGA_1324	2
TCGA-TM-A7C5	2	CGGA_1903	2
TCGA-DH-A7US	2	CGGA_413	1
TCGA-41-3915	1	CGGA_835	2
TCGA-P5-A736	2	CGGA_P364	1
TCGA-DU-6394	2	CGGA_675	2
TCGA-14-1825	1	CGGA_1568	2
TCGA-HT-A74K	2	CGGA_P11	2
TCGA-TQ-A7RI	2	CGGA_P174	2
TCGA-DU-6400	2	CGGA_1496	2
TCGA-S9-A6WP	2	CGGA_1718	2
TCGA-P5-A781	2	CGGA_899	2
TCGA-06-0210	1	CGGA_1286	2
TCGA-15-1444	2	CGGA_1567	1
TCGA-14-1034	1	CGGA_P3	2
TCGA-06-2570	1	CGGA_1275	1
TCGA-DU-A7T6	2	CGGA_1606	1
TCGA-DH-A669	2	CGGA_619	1
TCGA-06-2565	1	CGGA_1135	1
TCGA-06-2559	1	CGGA_1019	1
TCGA-P5-A730	2	CGGA_1212	1
TCGA-HT-7478	2	CGGA_1645	2
TCGA-S9-A6WM	1	CGGA_1111	1
TCGA-TQ-A7RW	1	CGGA_1572	1
TCGA-E1-A7Z3	2	CGGA_288	2
TCGA-12-3653	1	CGGA_1902	2
TCGA-27-2523	2	CGGA_1335	2
TCGA-19-0957	1	CGGA_1207	2
TCGA-12-0619	1	CGGA_1311	2
TCGA-DU-8168	2	CGGA_P415	1
TCGA-P5-A5F1	2	CGGA_247	2
TCGA-HT-7880	2	CGGA_D32	1
TCGA-TQ-A7RG	2	CGGA_1208	1
TCGA-HT-7692	2	CGGA_426	1
TCGA-HT-8558	2	CGGA_1688	1
TCGA-P5-A5F6	1	CGGA_625	2
TCGA-DH-5142	2	CGGA_1563	1
TCGA-DB-5273	2	CGGA_P31	2
TCGA-DU-A7TA	2	CGGA_1702	1
TCGA-RY-A83X	2	CGGA_564	1
TCGA-HT-7610	2	CGGA_1160	1
TCGA-DU-A5TY	1	CGGA_551	2
TCGA-P5-A72W	2	CGGA_1713	1
TCGA-QH-A6XA	2	CGGA_1687	1
TCGA-S9-A6U2	2	CGGA_1370	2
TCGA-TM-A84H	2	CGGA_1218	1
TCGA-DB-A64P	2	CGGA_1786	2
TCGA-FG-8185	2	CGGA_1301	1
TCGA-E1-5307	2	CGGA_1124	1
TCGA-DU-7013	2	CGGA_815	1
TCGA-DU-6399	2	CGGA_607	2
TCGA-HT-7611	2	CGGA_1908	1
TCGA-DB-A4XA	2	CGGA_P164	2
TCGA-DB-A4XC	2	CGGA_1562	2
TCGA-E1-5318	2	CGGA_333	2
TCGA-DU-6402	1	CGGA_252	2
TCGA-WY-A85D	2	CGGA_1703	2
TCGA-DU-7007	2	CGGA_887	2
TCGA-DB-A64X	2	CGGA_P30	1
TCGA-06-5411	1	CGGA_P104	2
TCGA-06-2567	1	CGGA_1361	2
TCGA-26-5139	1	CGGA_1052	2
TCGA-32-5222	1	CGGA_1685	1
TCGA-02-0047	1	CGGA_859	1
TCGA-14-0736	1	CGGA_1425	1
TCGA-06-5859	1	CGGA_P93	1
TCGA-27-2521	2	CGGA_165	2
TCGA-06-0743	1	CGGA_1513	2
TCGA-14-1823	1	CGGA_1205	2
TCGA-HT-7856	2	CGGA_1530	2
TCGA-16-1045	1	CGGA_1337	1
TCGA-76-4926	1	CGGA_1246	2
TCGA-HW-A5KL	2	CGGA_457	1
TCGA-TM-A7CF	2	CGGA_490	2
TCGA-S9-A6TU	2	CGGA_1338	1
TCGA-HT-7602	2	CGGA_1273	2
TCGA-CS-5396	2	CGGA_1972	1
TCGA-S9-A6WG	1	CGGA_1643	1
TCGA-S9-A6WQ	2	CGGA_1502	2
TCGA-HT-7606	2	CGGA_320	2
TCGA-HT-7470	2	CGGA_1053	1
TCGA-HT-7468	2	CGGA_P17	2
TCGA-12-1597	2	CGGA_1586	1
TCGA-06-5410	1	CGGA_P23	2
TCGA-32-2638	1	CGGA_P156	2
TCGA-14-0790	1	CGGA_1946	1
TCGA-14-0787	1	CGGA_1575	1
TCGA-06-0644	1	CGGA_491	2
TCGA-06-0744	1	CGGA_908	2
TCGA-06-0749	1	CGGA_1100	2
TCGA-19-2620	1	CGGA_1171	1
TCGA-32-2616	1	CGGA_1272	2
TCGA-08-0386	1	CGGA_1079	1
TCGA-VM-A8CA	2	CGGA_1231	1
TCGA-06-0211	1	CGGA_1132	2
TCGA-FG-7643	2	CGGA_1503	2
TCGA-DU-6404	2	CGGA_1642	2
TCGA-TM-A84F	1	CGGA_1215	1
TCGA-P5-A731	2	CGGA_420	2
TCGA-E1-5304	2	CGGA_272	1
TCGA-E1-A7YQ	1	CGGA_D46	2
TCGA-DU-A7TB	2	CGGA_681	1
TCGA-HT-7485	2	CGGA_P5	1
TCGA-HT-A5R7	2	CGGA_752	2
TCGA-FG-6690	2	CGGA_P411	2
TCGA-DU-7292	2	CGGA_1026	1
TCGA-CS-6670	2	CGGA_1560	1
TCGA-DU-7011	2	CGGA_1474	2
TCGA-26-5134	1	CGGA_P89	1
TCGA-26-1442	2	CGGA_P328	1
TCGA-06-0156	1	CGGA_1368	2
TCGA-12-3652	1	CGGA_330	1
TCGA-19-5960	1	CGGA_P401	2
TCGA-06-2557	1	CGGA_680	1
TCGA-06-0686	1	CGGA_1238	1
TCGA-19-2625	1	CGGA_1524	2
TCGA-28-2514	1	CGGA_1178	1
TCGA-06-2558	1	CGGA_1299	1
TCGA-06-0882	1	CGGA_1177	1
TCGA-DB-A75K	2	CGGA_1346	1
TCGA-TQ-A7RM	2	CGGA_1237	1
TCGA-DH-A66B	2	CGGA_431	2
TCGA-DB-A4XE	2	CGGA_1305	2
TCGA-E1-A7YY	2	CGGA_1857	1
TCGA-TQ-A7RH	2	CGGA_747	2
TCGA-DU-6406	1	CGGA_1700	2
TCGA-DU-7014	2	CGGA_P122	2
TCGA-P5-A735	2	CGGA_1771	2
TCGA-FG-A6IZ	2	CGGA_1162	2
TCGA-S9-A6U1	2	CGGA_1359	1
TCGA-E1-5302	2	CGGA_510	2
TCGA-TM-A84Q	2	CGGA_P20	2
TCGA-DU-6395	2	CGGA_P7	1
TCGA-R8-A73M	2	CGGA_509	1
TCGA-DH-A66D	2	CGGA_1365	2
TCGA-HT-8104	1	CGGA_485	2
TCGA-HT-8012	2	CGGA_1421	2
TCGA-TM-A84G	2	CGGA_323	2
TCGA-P5-A72X	2	CGGA_1681	1
TCGA-HW-7489	2	CGGA_P438	2
TCGA-KT-A7W1	1	CGGA_1510	1
TCGA-DU-7015	2	CGGA_1533	1
TCGA-HT-7686	2	CGGA_1317	2
TCGA-VW-A8FI	1	CGGA_1318	1
TCGA-S9-A6U6	2	CGGA_1760	1
TCGA-DB-5279	2	CGGA_1113	2
TCGA-VM-A8CE	2	CGGA_1270	2
TCGA-DU-A5TU	2	CGGA_1911	1
TCGA-HT-A618	2	CGGA_1819	1
TCGA-P5-A5F2	2	CGGA_1640	2
TCGA-FG-A70Y	2	CGGA_P437	2
TCGA-QH-A6CY	2	CGGA_1050	2
TCGA-WY-A85A	2	CGGA_P21	1
TCGA-VM-A8CD	1	CGGA_D40	2
TCGA-E1-5303	2	CGGA_635	2
TCGA-HT-7482	2	CGGA_1901	1
TCGA-QH-A6CV	1	CGGA_336	2
TCGA-TM-A7CA	2	CGGA_662	2
TCGA-HT-7620	2	CGGA_1809	1
TCGA-FG-5964	2	CGGA_1571	2
TCGA-DB-5270	2	CGGA_493	2
TCGA-CS-4944	2	CGGA_1103	2
TCGA-R8-A6MO	2	CGGA_1211	2
TCGA-VM-A8C8	2	CGGA_1307	1
TCGA-HT-A74L	2	CGGA_1500	1
TCGA-FG-8187	2	CGGA_1235	1
TCGA-E1-A7YE	1	CGGA_1175	1
TCGA-DU-5855	2	CGGA_1679	2
TCGA-E1-5319	2	CGGA_791	1
TCGA-DU-A5TW	2	CGGA_543	2
TCGA-E1-A7YO	2	CGGA_1127	2
TCGA-FG-7638	2	CGGA_1214	1
TCGA-HT-A5RA	1	CGGA_1460	1
TCGA-DB-A4XD	2	CGGA_720	2
TCGA-HT-8013	2	CGGA_1256	1
TCGA-DU-6401	2	CGGA_P172	2
TCGA-DH-5141	2	CGGA_1721	2
TCGA-HT-7477	2	CGGA_P271	2
TCGA-HW-A5KJ	2	CGGA_1653	2
TCGA-P5-A780	1	CGGA_P131	2
TCGA-E1-A7YM	1	CGGA_D56	2
TCGA-FG-8188	2	CGGA_P115	2
TCGA-S9-A6TV	1	CGGA_1204	2
TCGA-HT-A617	1	CGGA_721	1
TCGA-CS-4938	2	CGGA_236	2
TCGA-E1-5311	2	CGGA_P159	1
TCGA-DB-A4XH	2	CGGA_838	2
TCGA-E1-A7YH	2	CGGA_1322	2
TCGA-DH-A7UU	2	CGGA_678	1
TCGA-HW-7493	2	CGGA_757	2
TCGA-P5-A5EY	2	CGGA_P84	1
TCGA-FG-6692	1	CGGA_1880	2
TCGA-HW-7491	2	CGGA_P146	1
TCGA-HW-7486	2	CGGA_1589	2
TCGA-DB-A4XF	2	CGGA_1424	2
TCGA-32-1982	1	CGGA_P173	1
TCGA-28-2509	1	CGGA_796	1
TCGA-06-0125	1	CGGA_1433	1
TCGA-06-0158	1	CGGA_1264	2
TCGA-14-0789	1	CGGA_1410	1
TCGA-06-0174	2	CGGA_D64	1
TCGA-02-2486	1	CGGA_565	2
TCGA-76-4931	1	CGGA_1521	1
TCGA-06-2564	1	CGGA_789	1
TCGA-TM-A84O	2	CGGA_D27	2
TCGA-S9-A7R8	2	CGGA_624	1
TCGA-FG-A4MU	1	CGGA_P165	2
TCGA-CS-5393	2	CGGA_D51	1
TCGA-VV-A829	2	CGGA_777	1
TCGA-FG-8182	2	CGGA_1087	2
TCGA-HT-7881	2	CGGA_1400	2
TCGA-DB-5277	2	CGGA_P108	2
TCGA-27-1837	1	CGGA_863	2
TCGA-26-5136	1	CGGA_658	1
TCGA-S9-A7QZ	2	CGGA_1471	1
TCGA-DU-6542	2	CGGA_1334	1
TCGA-VW-A7QS	2	CGGA_D50	2
TCGA-16-0846	1	CGGA_694	2
TCGA-06-0238	1	CGGA_1690	1
TCGA-27-2526	1	CGGA_J024	1
TCGA-32-4213	1	CGGA_J030	2
TCGA-DU-7018	2	CGGA_1527	1
TCGA-QH-A65V	2	CGGA_1320	1
TCGA-DU-A6S3	2	CGGA_P286	2
TCGA-DU-5872	1	CGGA_541	2
TCGA-S9-A7R3	2	CGGA_1463	2
TCGA-S9-A6TW	2	CGGA_1528	2
TCGA-S9-A7QY	2	CGGA_1234	1
TCGA-DU-7008	2	CGGA_2006	2
TCGA-DH-5140	2	CGGA_1854	2
TCGA-HT-7601	2	CGGA_D16	1
TCGA-DU-7298	2	CGGA_882	2
TCGA-S9-A7QX	2	CGGA_290	2
TCGA-HT-A4DV	2	CGGA_1882	2
TCGA-FG-A60J	2	CGGA_P111	2
TCGA-HT-7693	2	CGGA_1650	1
TCGA-S9-A7R2	1	CGGA_1725	2
TCGA-DU-8162	2	CGGA_634	2
TCGA-HT-A5RC	1	CGGA_D37	1
TCGA-FG-A710	2	CGGA_P422	2
TCGA-HT-7605	2	CGGA_1462	1
TCGA-DB-A75P	2	CGGA_1081	1
TCGA-TQ-A8XE	2	CGGA_1189	2
TCGA-DU-7299	2	CGGA_1478	1
TCGA-DU-7006	1	CGGA_785	2
TCGA-DU-6405	1	CGGA_1477	2
TCGA-S9-A7J0	2	CGGA_1402	1
TCGA-06-0745	1	CGGA_P310	2
TCGA-12-5295	1	CGGA_1728	1
TCGA-27-1831	1	CGGA_P199	1
TCGA-27-1832	1	CGGA_1727	2
TCGA-06-0132	1	CGGA_1866	1
TCGA-27-1834	1	CGGA_P137	2
TCGA-CS-6669	2	CGGA_1430	2
TCGA-TQ-A7RQ	2	CGGA_1413	2
TCGA-EZ-7264	2	CGGA_D11	1
TCGA-CS-5397	2	CGGA_1525	2
TCGA-DU-8163	2	CGGA_1121	2
TCGA-DU-A76R	2	CGGA_731	1
TCGA-QH-A65Z	2	CGGA_1403	1
TCGA-DU-6396	2	CGGA_1475	1
TCGA-RY-A840	2	CGGA_1412	2
TCGA-P5-A5F4	2	CGGA_1356	2
TCGA-DB-5281	2	CGGA_861	2
TCGA-DB-5275	2	CGGA_1626	1
TCGA-IK-8125	2	CGGA_1486	2
TCGA-HT-A615	2	CGGA_730	1
TCGA-FG-8181	2	CGGA_1314	1
TCGA-HT-8114	2	CGGA_1693	2
TCGA-DB-A64O	1	CGGA_1223	1
TCGA-DU-5849	2	CGGA_898	2
TCGA-DH-5144	2	CGGA_1136	1
TCGA-FG-8189	2	CGGA_1605	2
TCGA-S9-A6WH	2	CGGA_139	2
TCGA-WY-A85B	2	CGGA_1004	1
TCGA-TM-A84R	2	CGGA_1329	2
TCGA-DU-A76L	1	CGGA_1673	2
TCGA-CS-4942	2	CGGA_1516	2
TCGA-S9-A6TY	2	CGGA_852	1
TCGA-QH-A86X	2	CGGA_1659	1
TCGA-DU-7290	1	CGGA_643	1
TCGA-QH-A6XC	2	CGGA_901	1
TCGA-TM-A84T	2	CGGA_1285	1
TCGA-HT-8010	2	CGGA_700	2
TCGA-DU-A5TS	2	CGGA_279	1
TCGA-DU-7010	2	CGGA_1014	1
TCGA-DU-A6S7	2	CGGA_107	1
TCGA-HT-8109	2	CGGA_1049	1
TCGA-FG-A4MY	2	CGGA_1141	2
TCGA-HT-A61B	2	CGGA_1615	2
TCGA-QH-A65X	2	CGGA_P358	1
TCGA-HT-8019	2	CGGA_1631	1
TCGA-DU-5854	1	CGGA_P153	2
TCGA-DU-6408	2	CGGA_P179	1
TCGA-S9-A7IZ	2	CGGA_578	2
TCGA-P5-A5EX	2	CGGA_1583	2
TCGA-E1-A7YL	1	CGGA_1985	1
TCGA-DU-8164	2	CGGA_1180	1
TCGA-FG-A711	2	CGGA_1747	2
TCGA-HW-7495	2	CGGA_1667	2
TCGA-TM-A84C	1	CGGA_P298	2
TCGA-DU-A76K	2	CGGA_474	1
TCGA-S9-A6U8	2	CGGA_1716	1
TCGA-S9-A7IQ	2	CGGA_1497	1
TCGA-S9-A6TZ	2	CGGA_1287	2
TCGA-DU-7300	2	CGGA_1566	2
TCGA-E1-A7YJ	1	CGGA_P319	1
TCGA-DU-A6S2	2	CGGA_1020	2
TCGA-HT-A619	2	CGGA_1607	2
TCGA-RY-A847	2	CGGA_632	1
TCGA-S9-A6U5	2	CGGA_374	2
TCGA-HT-8011	1	CGGA_1608	1
TCGA-DB-A75O	2	CGGA_1381	1
TCGA-DB-A64U	2	CGGA_884	2
TCGA-WY-A858	2	CGGA_P295	1
TCGA-P5-A5EZ	2	CGGA_1706	1
TCGA-E1-A7YK	1	CGGA_1745	2
TCGA-HT-7475	2	CGGA_1618	2
TCGA-DU-7302	2	CGGA_1340	2
TCGA-S9-A6TX	2	CGGA_1451	1
TCGA-S9-A7J1	2	CGGA_1617	2
TCGA-WH-A86K	2	CGGA_604	1
TCGA-FG-A60K	2	CGGA_28	2
TCGA-CS-6290	2	CGGA_1548	1
TCGA-HW-8319	2	CGGA_482	2
TCGA-HT-7688	2	CGGA_1601	1
TCGA-HT-7479	2	CGGA_1116	2
TCGA-DB-5278	2	CGGA_1469	2
TCGA-FG-7634	2	CGGA_1240	1
TCGA-S9-A7J3	2	CGGA_703	1
TCGA-28-1753	1	CGGA_1536	1
TCGA-32-2615	1	CGGA_P28	1
TCGA-S9-A6WN	2	CGGA_1670	1
TCGA-DU-8165	1	CGGA_641	2
TCGA-S9-A6U0	1	CGGA_1491	1
TCGA-HW-8322	2	CGGA_903	2
TCGA-QH-A65S	2	CGGA_1154	1
TCGA-E1-A7Z4	2	CGGA_502	2
TCGA-HT-A61C	1	CGGA_812	2
TCGA-HW-7487	2	CGGA_1281	2
TCGA-QH-A870	2	CGGA_314	2
TCGA-DU-A7T8	2	CGGA_1541	1
TCGA-TM-A84J	2	CGGA_D62	1
TCGA-HT-7603	2	CGGA_D48	2
TCGA-19-1390	2	CGGA_1034	1
TCGA-32-1980	1	CGGA_1458	2
TCGA-06-0168	1	CGGA_669	2
TCGA-06-5412	1	CGGA_1635	2
TCGA-E1-5305	2	CGGA_1457	1
TCGA-CS-5395	2	CGGA_1106	1
TCGA-DU-8158	1	CGGA_P98	2
TCGA-E1-A7YN	1	CGGA_D29	2
TCGA-S9-A7R4	2	CGGA_1611	1
TCGA-W9-A837	2	CGGA_1145	1
TCGA-P5-A77X	2	CGGA_P150	1
TCGA-FG-6689	2	CGGA_1580	2
TCGA-HT-7469	2	CGGA_1387	1
TCGA-DU-7009	2	CGGA_715	2
TCGA-HT-7677	2	CGGA_1183	1
TCGA-HT-7684	2	CGGA_1388	1
TCGA-DU-A6S6	2	CGGA_D35	1
TCGA-32-2632	1	CGGA_1419	1
TCGA-12-3650	1	CGGA_1736	1
TCGA-06-0130	1	CGGA_1444	1
TCGA-HT-7681	2	CGGA_1023	1
TCGA-HT-A616	2	CGGA_759	1
TCGA-DU-7019	2	CGGA_1342	1
TCGA-HT-8113	2	CGGA_135	1
TCGA-HT-7873	2	CGGA_1409	2
TCGA-HW-8320	2	CGGA_1661	2
TCGA-HT-A74J	2	CGGA_808	1
TCGA-RY-A845	2	CGGA_1022	1
TCGA-E1-A7YW	2	CGGA_P269	2
TCGA-DU-A76O	2	CGGA_1148	1
TCGA-S9-A6UA	1	CGGA_1343	1
TCGA-HT-A74H	1	CGGA_1780	2
TCGA-S9-A6WE	2	CGGA_1147	2
TCGA-S9-A6WO	2	CGGA_1699	2
TCGA-DU-7306	2	CGGA_1594	2
TCGA-HW-A5KK	1	CGGA_1455	2
TCGA-WY-A85C	2	CGGA_1017	2
TCGA-CS-4941	1	CGGA_525	1
TCGA-E1-A7YV	1	CGGA_D24	1
TCGA-15-0742	1	CGGA_676	1
TCGA-06-5417	2	CGGA_1591	2
TCGA-26-5135	1	CGGA_1018	2
TCGA-06-5418	1	CGGA_782	1
TCGA-28-5215	1	CGGA_2024	2
TCGA-06-0152	1	CGGA_1065	2
TCGA-HT-7884	2	CGGA_1569	2
TCGA-VM-A8CH	2	CGGA_P316	2
TCGA-P5-A72Z	2	CGGA_1664	2
TCGA-FG-8191	2	CGGA_893	2
TCGA-FG-7641	2	CGGA_583	2
TCGA-28-5208	1	CGGA_245	1
TCGA-06-0141	1	CGGA_1744	1
TCGA-S9-A6WI	2	CGGA_1008	1
TCGA-06-5413	1	CGGA_1620	2
TCGA-12-0821	1	CGGA_1007	1
TCGA-12-5299	1	CGGA_1350	2
TCGA-06-2561	1	CGGA_766	2
TCGA-14-0871	1	CGGA_1557	2
TCGA-14-2554	1	CGGA_P306	2
TCGA-28-1747	1	CGGA_1558	1
		CGGA_507	1
		CGGA_406	2
		CGGA_605	1
		CGGA_D58	2
		CGGA_1709	1
		CGGA_1441	1
		CGGA_1791	2
		CGGA_1656	1
		CGGA_831	1
		CGGA_671	2
		CGGA_300	1
		CGGA_P142	2
		CGGA_1068	1
		CGGA_1197	2
		CGGA_1031	2
		CGGA_1769	2
		CGGA_1072	1
		CGGA_1139	1
		CGGA_1833	1
		CGGA_400	1
		CGGA_1544	2
		CGGA_1015	1
		CGGA_1649	2
		CGGA_P280	2
		CGGA_760	2
		CGGA_1614	2
		CGGA_1326	1
		CGGA_1393	1
		CGGA_1198	2
		CGGA_P87	1
		CGGA_1494	2
		CGGA_P176	2
		CGGA_P143	1
		CGGA_1953	1
		CGGA_1284	1
		CGGA_1059	1
		CGGA_1073	1
		CGGA_1758	1
		CGGA_761	2
		CGGA_1604	1
		CGGA_P15	2
		CGGA_1005	2
		CGGA_194	2
		CGGA_P185	1
		CGGA_1392	1
		CGGA_1037	2
		CGGA_1292	2
		CGGA_1191	2
		CGGA_1099	1
		CGGA_1595	2
		CGGA_274	1
		CGGA_1454	2
		CGGA_842	1
		CGGA_1482	2
		CGGA_1061	2
		CGGA_1384	2
		CGGA_1169	1
		CGGA_1739	1
		CGGA_P19	1
		CGGA_1863	2
		CGGA_1226	1
		CGGA_P266	2
		CGGA_1696	2
		CGGA_1623	1
		CGGA_1353	1
		CGGA_1158	2
		CGGA_580	2
		CGGA_890	2
		CGGA_1862	1
		CGGA_1445	2
		CGGA_738	1
		CGGA_1157	1
		CGGA_1406	1
		CGGA_254	2
		CGGA_616	1
		CGGA_261	2
		CGGA_599	1
		CGGA_889	2
		CGGA_2003	2
		CGGA_1119	1
		CGGA_1011	1
		CGGA_1598	1
		CGGA_1035	1
		CGGA_P283	1
		CGGA_1539	1
		CGGA_1634	1
		CGGA_1597	1
		CGGA_1390	1
		CGGA_487	1
		CGGA_1144	2
		CGGA_2013	2
		CGGA_1551	1
		CGGA_1155	2
		CGGA_1886	1
		CGGA_479	2
		CGGA_2002	2
		CGGA_1447	2
		CGGA_1070	1
		CGGA_1875	1
		CGGA_763	2
		CGGA_D34	2
		CGGA_1109	1
		CGGA_1001	1
		CGGA_499	1
		CGGA_1750	1
		CGGA_1592	2
		CGGA_1807	1
		CGGA_1295	1
		CGGA_1024	1
		CGGA_D63	2
		CGGA_1309	2
		CGGA_685	2
		CGGA_1443	1
		CGGA_850	1
		CGGA_1476	1
		CGGA_1526	2
		CGGA_1319	2
		CGGA_P439	2
		CGGA_448	1
		CGGA_1817	1
		CGGA_1190	2
		CGGA_864	2
		CGGA_503	2
		CGGA_876	1
		CGGA_362	1
		CGGA_902	1
		CGGA_1060	2
		CGGA_2008	2
		CGGA_1865	1
		CGGA_267	2
		CGGA_D38	2
		CGGA_1487	2
		CGGA_1627	2
		CGGA_J50	1
		CGGA_P180	2
		CGGA_630	2
		CGGA_D45	2
		CGGA_1071	1
		CGGA_1239	2
		CGGA_1488	2
		CGGA_1184	2
		CGGA_1152	1
		CGGA_1251	2
		CGGA_1369	2
		CGGA_P136	2
		CGGA_P83	2
		CGGA_1391	1
		CGGA_871	2
		CGGA_P25	2
		CGGA_1033	2
		CGGA_1815	1
		CGGA_856	2
		CGGA_J042	2
		CGGA_1010	2
		CGGA_1481	2
		CGGA_1078	1
		CGGA_1621	2
		CGGA_621	1
		CGGA_1077	1
		CGGA_P385	2
		CGGA_1192	1
		CGGA_1291	2
		CGGA_D61	2
		CGGA_1440	2
		CGGA_P147	1
		CGGA_810	1
		CGGA_P29	2
		CGGA_1269	2
		CGGA_1339	2
		CGGA_1126	2
		CGGA_1899	1
		CGGA_P86	2
		CGGA_1398	2
		CGGA_J73	2
		CGGA_1257	1
		CGGA_501	2
		CGGA_D28	2
		CGGA_1258	1
		CGGA_P99	2
		CGGA_642	2
		CGGA_1086	2
		CGGA_P145	2
		CGGA_P106	1
		CGGA_1553	2
		CGGA_837	1
		CGGA_483	1
		CGGA_1003	2
		CGGA_P388	1
		CGGA_1579	2
		CGGA_P183	2
		CGGA_1870	2
		CGGA_1075	1
		CGGA_1012	1
		CGGA_1219	2
		CGGA_1255	1
		CGGA_809	2
		CGGA_1552	2
		CGGA_1689	2
		CGGA_1429	2
		CGGA_P116	2
		CGGA_495	1
		CGGA_1002	1
		CGGA_P182	1
		CGGA_633	2
		CGGA_1811	1
		CGGA_724	2
		CGGA_1030	2
		CGGA_689	2
		CGGA_1013	2
		CGGA_1610	1
		CGGA_P151	2
		CGGA_1236	2
		CGGA_780	1
		CGGA_1814	1
		CGGA_P392	2
		CGGA_1185	1
		CGGA_D44	2
		CGGA_545	1
		CGGA_283	2
		CGGA_652	2
		CGGA_318	1
		CGGA_1671	1
		CGGA_843	2
		CGGA_1142	1
		CGGA_D59	2
		CGGA_103	2
		CGGA_1027	2
		CGGA_P326	2
		CGGA_1280	1
		CGGA_P279	2
		CGGA_1729	1
		CGGA_1660	2
		CGGA_1740	2
		CGGA_1383	2
		CGGA_1188	1
		CGGA_804	2
		CGGA_D15	2
		CGGA_762	2
		CGGA_1345	2
		CGGA_1354	1
		CGGA_1382	1
		CGGA_799	2
		CGGA_1624	1
		CGGA_1452	1
		CGGA_1820	1
		CGGA_P18	1
		CGGA_1613	1
		CGGA_1906	1
		CGGA_1630	2
		CGGA_P155	1
		CGGA_1394	2
		CGGA_707	2
		CGGA_1140	2
		CGGA_1216	1
		CGGA_1543	1
		CGGA_P109	1
		CGGA_822	2
		CGGA_1282	1
		CGGA_1181	2
		CGGA_869	1
		CGGA_1492	1
		CGGA_D19	1
		CGGA_1612	1
		CGGA_1675	1
		CGGA_J130	2
		CGGA_1074	1
		CGGA_494	2
		CGGA_358	2
		CGGA_1603	1
		CGGA_1916	1
		CGGA_1542	2
		CGGA_P144	1
		CGGA_892	2
		CGGA_458	2
		CGGA_1283	2
		CGGA_725	2
		CGGA_1686	2
		CGGA_1426	2
		CGGA_1588	2
		CGGA_1663	1
		CGGA_554	2
		CGGA_1743	2
		CGGA_1380	1
		CGGA_1776	1
		CGGA_1587	1
		CGGA_1785	1
		CGGA_P157	1
		CGGA_1450	2
		CGGA_598	2
		CGGA_888	2
		CGGA_P158	2
		CGGA_1662	2
		CGGA_846	1
		CGGA_560	2
		CGGA_106	1
		CGGA_1248	1
		CGGA_235	2
		CGGA_1678	2
		CGGA_P416	2
		CGGA_1129	1
